# Supplementary material
Source: PubMed Central journal article supplement (PMC380981)
Supplement: 7600126s2.pdf [file 7600126s2.pdf]

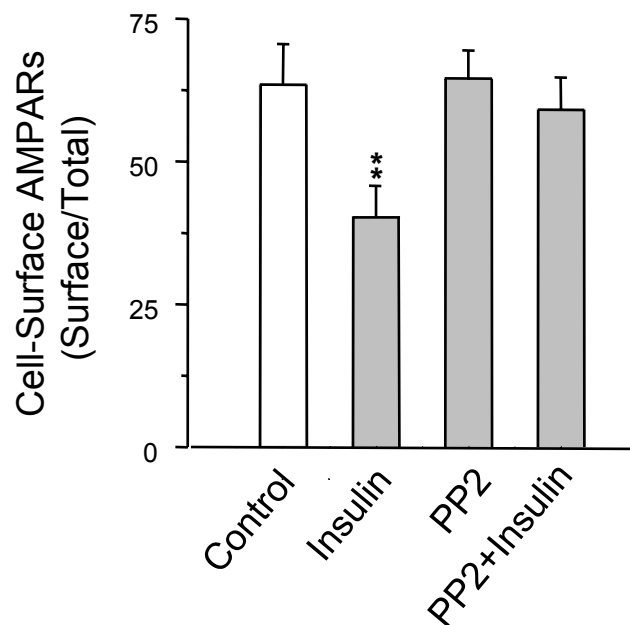

**Supplementary Figure 2. The insulin-induced reduction of cell-surface AMPA receptors is dependent on kinase activity of a non-receptor Src family kinase in cultured hippocampal neurons.** Cultured hippocampal neurons were treated with or without PP2 (20  $\mu$ M), a membrane permeant inhibitor that is specific for Src family tyrosine kinases, 10 min prior to and during insulin treatment (10 min; 0.5  $\mu$ M). PP2 treatment prevents the insulin-induced reduction of cell-surface AMPA receptors without altering its basal level of expression (n = 6).
